# Supplementary material for: Sec1/Munc18 protein Vps33 binds to SNARE domains and the quaternary SNARE complex
Source: PubMed Central journal article supplement — Mol Biol Cell. 2012 Dec 1;23(23):4611–22. doi: 10.1091/mbc.E12-05-0343 (PMC3510022; doi:10.1091/mbc.e12-05-0343), 2012-12-01

**Table I.** Strains and plasmids used in this study

| Name                             | Genotype                                                             | Reference/source                   |
|----------------------------------|----------------------------------------------------------------------|------------------------------------|
| <i>S. cerevisiae</i>             |                                                                      |                                    |
| SEY6210                          | <i>MATa leu2-3,112 ura3-52 his3-200 trp1-901<br/>lys2-801 suc2-9</i> | (Robinson <i>et al.</i> , 1988)    |
| BHY10                            | SEY6210 <i>CPY-Invertase::LEU2</i> (pBHY11)                          | (Horazdovsky <i>et al.</i> , 1994) |
| BY4742                           | <i>MATa his3Δ1 leu2Δ0 lys2Δ0 ura3Δ0</i>                              | ATCC                               |
| BY4742 <i>vps11Δ</i>             | BY4742; <i>vps11Δ::KAN</i>                                           | Invitrogen                         |
| BY4742 <i>vps16Δ</i>             | BY4742; <i>vps16Δ::KAN</i>                                           | Invitrogen                         |
| BY4742 <i>vps18Δ</i>             | BY4742; <i>vps18Δ::KAN</i>                                           | Invitrogen                         |
| AMY1275                          | BY4742; <i>vps33Δ::KAN</i>                                           | This work                          |
| BY4742 <i>vps39Δ</i>             | BY4742; <i>vps39Δ::KAN</i>                                           | Invitrogen                         |
| BY4742 <i>vps41Δ</i>             | BY4742; <i>vps41Δ::KAN</i>                                           | Invitrogen                         |
| BLY1                             | BHY10 <i>vps33Δ::KAN</i>                                             | This work                          |
| BY4742 <i>pep4Δ</i>              | BY4742 <i>pep4Δ::neo</i>                                             | (Collins <i>et al.</i> , 2007)     |
| BLY2                             | BY4742 <i>pep4Δ::neo vps33Δ::KAN</i>                                 | This work                          |
| BLY3                             | BHY10 <i>VPS33-ttx-GFP<sub>A207K</sub>::NAT</i>                      | This work                          |
| BLY4                             | BHY10 <i>vps33<sup>D88K</sup>-ttx-GFP<sub>A207K</sub>::NAT</i>       | This work                          |
| BLY5                             | BHY10 <i>vps33<sup>R281A</sup>-ttx-GFP<sub>A207K</sub>::NAT</i>      | This work                          |
| BLY6                             | BHY10 <i>vps33<sup>G297V</sup>-ttx-GFP<sub>A207K</sub>::NAT</i>      | This work                          |
| BLY7                             | BHY10 <i>vps33<sup>D300G</sup>-ttx-GFP<sub>A207K</sub>::NAT</i>      | This work                          |
| <b>Yeast Expression Plasmids</b> |                                                                      |                                    |
| pRS416                           | <i>URA3 CEN/ARSH4 Amp<sup>R</sup></i>                                | (Sikorski & Hieter, 1989)          |
| pBL1                             | <i>pRS416 VPS33pr::VPS33-ttx-GFP<sub>A207K</sub></i>                 | This work                          |
| pBL2                             | <i>pRS416 VPS33pr::vps33<sup>L75P</sup>-ttx-GFP<sub>A207K</sub></i>  | This work                          |
| pBL3                             | <i>pRS416 VPS33pr::vps33<sup>D88K</sup>-ttx-GFP<sub>A207K</sub></i>  | This work                          |
| pBL4                             | <i>pRS416 VPS33pr::vps33<sup>I278N</sup>-ttx-GFP<sub>A207K</sub></i> | This work                          |
| pBL5                             | <i>pRS416 VPS33pr::vps33<sup>R281A</sup>-ttx-GFP<sub>A207K</sub></i> | This work                          |
| pBL6                             | <i>pRS416 VPS33pr::vps33<sup>G297V</sup>-ttx-GFP<sub>A207K</sub></i> | This work                          |
| pBL7                             | <i>pRS416 VPS33pr::vps33<sup>D300G</sup>-ttx-GFP<sub>A207K</sub></i> | This work                          |
| pBL8                             | <i>pRS416 VPS33pr::vps33<sup>D300E</sup>-ttx-GFP<sub>A207K</sub></i> | This work                          |

|       |                                                                      |           |
|-------|----------------------------------------------------------------------|-----------|
| pBL9  | <i>pRS416 VPS33pr::ψps33<sup>F305L</sup>-ttx-GFP<sub>A207K</sub></i> | This work |
| pBL10 | <i>pRS416 VPS33pr::ψps33<sup>T553I</sup>-ttx-GFP<sub>A207K</sub></i> | This work |
| pBL11 | <i>pRS416 VPS33pr::ψps33<sup>E653A</sup>-ttx-GFP<sub>A207K</sub></i> | This work |

### ***Bacterial Expression Plasmids***

|                |                                                                                       |                                  |
|----------------|---------------------------------------------------------------------------------------|----------------------------------|
| pHIS parallel1 | pET22B- <i>amp<sup>R</sup> GST-(tev)-</i>                                             | (Sheffield <i>et al.</i> , 1999) |
| pGST parallel1 | pGEX4T1- <i>amp<sup>R</sup> GST-(tev)-</i>                                            | (Sheffield <i>et al.</i> , 1999) |
| pRP1           | pRSF- <i>kan<sup>R</sup> His<sub>7</sub>-MBP-(tev)-</i>                               | This work                        |
| pBL12          | pRSF- <i>kan<sup>R</sup> His6-GFP<sub>A207K</sub>-(tev)-</i>                          | This work                        |
| pBL12          | pRSF- <i>kan<sup>R</sup> -(tev)-GST</i>                                               | This work                        |
| pBL13          | pBL12- <i>kan<sup>R</sup> SSO1(1-265)-(tev)-GST</i>                                   | This work                        |
| pBL14          | pBL12- <i>kan<sup>R</sup> VAM3 (1-264)-(tev)-GST</i>                                  | This work                        |
| pBL15          | pBL12- <i>kan<sup>R</sup> VAM3<sub>Habc</sub> (1-145)-(tev)-GST</i>                   | This work                        |
| pBL16          | pBL12- <i>kan<sup>R</sup> VAM3<sub>Linker</sub> (116-186)-(tev)-GST</i>               | This work                        |
| pBL17          | pBL12- <i>kan<sup>R</sup> VAM3<sub>SNARE</sub> (182-264)-(tev)-GST</i>                | This work                        |
| -              | pGST parallel1- <i>amr<sup>R</sup> GST-Vti1 (1-194)</i>                               | (Stroupe <i>et al.</i> , 2006)   |
| AMB73          | pGEX-KET- <i>amp<sup>R</sup> GST-VAM7 (2-316)</i>                                     | (Merz <i>et al.</i> , 2004)      |
| AMB74          | pGEX-KET- <i>amp<sup>R</sup> GST-VAM7<sub>PX</sub> (2-123)</i>                        | (Merz <i>et al.</i> , 2004)      |
| pBL18          | pGST paralle1- <i>amp<sup>R</sup> GST-(tev)-NYV1 (1-231)</i>                          | This work                        |
| pBL19          | pRP1- <i>kan<sup>R</sup> His<sub>7</sub>-MBP-(tev)-VTI1 (1-194)</i>                   | This work                        |
| AMB225         | pTYB3- <i>amp<sup>R</sup> His6-Vam7 (1-316)</i>                                       | (Schwartz <i>et al.</i> , 2009)  |
| pBL20          | pHIS paralle1- <i>amp<sup>R</sup> His<sub>6</sub>-(tev)-NYV1 (1-231)</i>              | This work                        |
| pBL21          | pHIS paralle1- <i>amp<sup>R</sup> His<sub>6</sub>-(tev)-NYV1<sub>5Δ</sub> (1-211)</i> | This work                        |
| pBL22          | pBL12- <i>kan<sup>R</sup> His6-GFP<sub>A207K</sub>-(tev)-Vam7 (190-316)</i>           | This work                        |
| pBL23          | pGST paralle1- <i>amp<sup>R</sup> GST-(tev)-Vam7<sub>SNARE</sub> (190-316)</i>        | This work                        |
| pBL24          | pGST paralle1- <i>amp<sup>R</sup> GST-(tev)-NYV1<sub>SNARE</sub> (162-231)</i>        | This work                        |
| pBL25          | pGST paralle1- <i>amp<sup>R</sup> GST-(tev)-SED5<sub>SNARE</sub> (170-319)</i>        | This work                        |
| pBL26          | pHIS paralle1- <i>amp<sup>R</sup> His<sub>6</sub>-(tev)-BOS1 (1-222)</i>              | This work                        |

|        |                                                                                  |                              |
|--------|----------------------------------------------------------------------------------|------------------------------|
| pBL27  | pHIS paralle1- <i>amp<sup>R</sup> His<sub>6</sub>-(tev)-SE22 (1-188)</i>         | This work                    |
| pSN358 | pET14b- <i>amp<sup>R</sup> His<sub>6</sub>-BET1 (1-123)</i>                      | (Stone <i>et al.</i> , 1997) |
| pBL28  | pGST paralle1- <i>amp<sup>R</sup> GST-(tev)-YKT6 (1-195)</i>                     | This work                    |
| pBL29  | pGST paralle1- <i>amp<sup>R</sup> GST-(tev)-SE22 (1-188)</i>                     | This work                    |
| pBL30  | pHIS paralle1- <i>amp<sup>R</sup> His<sub>6</sub>-(tev)-YKT6 (1-195)</i>         | This work                    |
| pBL31  | pBL17- <i>kan<sup>R</sup> VAM3<sub>SN,ARE(+9Δ)</sub> (192-264)-(tev)-GST</i>     | This work                    |
| pBL32  | pBL17- <i>kan<sup>R</sup> VAM3<sub>SN,ARE(+7Δ)</sub> (199-264)-(tev)-GST</i>     | This work                    |
| pBL33  | pBL17- <i>kan<sup>R</sup> VAM3<sub>SN,ARE(+5Δ)</sub> (206-264)-(tev)-GST</i>     | This work                    |
| pBL34  | pBL17- <i>kan<sup>R</sup> VAM3<sub>SN,ARE(+3Δ)</sub> (213-264)-(tev)-GST</i>     | This work                    |
| pBL35  | pBL17- <i>kan<sup>R</sup> VAM3<sub>SN,ARE(+1Δ)</sub> (220-264)-(tev)-GST</i>     | This work                    |
| pBL36  | pBL17- <i>kan<sup>R</sup> VAM3<sub>SN,ARE(+1Δ)</sub> (227-264)-(tev)-GST</i>     | This work                    |
| pBL37  | pBL17- <i>kan<sup>R</sup> VAM3<sub>SN,ARE(+3Δ)</sub> (234-264)-(tev)-GST</i>     | This work                    |
| pBL38  | pBL17- <i>kan<sup>R</sup> VAM3<sub>SN,ARE(+5Δ)</sub> (241-264)-(tev)-GST</i>     | This work                    |
| pBL39  | pBL17- <i>kan<sup>R</sup> SSO1<sub>SN,ARE</sub> (184-265)-(tev)-GST</i>          | This work                    |
| pBL40  | pGST paralle1- <i>amp<sup>R</sup> GST-(tev)- VAM3<sub>SN,ARE</sub> (182-264)</i> | This work                    |
| pBL41  | pBL40- <i>amp<sup>R</sup> GST-(tev)- VAM3<sub>SN,ARE(+9Δ)</sub> (182-257)</i>    | This work                    |
| pBL42  | pBL40- <i>amp<sup>R</sup> GST-(tev)- VAM3<sub>SN,ARE(+7Δ)</sub> (182-250)</i>    | This work                    |
| pBL43  | pBL40- <i>amp<sup>R</sup> GST-(tev)- VAM3<sub>SN,ARE(+5Δ)</sub> (182-243)</i>    | This work                    |
| pBL44  | pBL40- <i>amp<sup>R</sup> GST-(tev)- VAM3<sub>SN,ARE(+3Δ)</sub> (182-236)</i>    | This work                    |
| pBL43  | pBL40- <i>amp<sup>R</sup> GST-(tev)- VAM3<sub>SN,ARE(+1Δ)</sub> (182-222)</i>    | This work                    |
| pBL43  | pBL40- <i>amp<sup>R</sup> GST-(tev)- VAM3<sub>SN,ARE(-5Δ)</sub> (182-208)</i>    | This work                    |
| pBL44  | pBL18- <i>amp<sup>R</sup> GST-(tev)-NYV1<sub>(+9Δ)</sub> (1-225)</i>             | This work                    |
| pBL45  | pBL18- <i>amp<sup>R</sup> GST-(tev)-NYV1<sub>+7Δ)</sub> (1-218)</i>              | This work                    |
| pBL46  | pBL18- <i>amp<sup>R</sup> GST-(tev)-NYV1<sub>(+5Δ)</sub> (1-211)</i>             | This work                    |
| pBL47  | pBL18- <i>amp<sup>R</sup> GST-(tev)-NYV1<sub>(+5Δ)</sub> (1-211)</i>             | This work                    |
| pBL47  | pBL12- <i>kan<sup>R</sup> PEP12 (1-268)-(tev)-GST</i>                            | This work                    |
| pBL48  | pBL12- <i>kan<sup>R</sup> SED5 (1-319)-(tev)-GST</i>                             | This work                    |

## SUPPLEMENTAL FIGURE LEGENDS

**Figure S1.** Vps11 and Vps18 required for interaction between HOPS and the Vam3-H<sub>abc</sub>. As in Figure 1B, the cytoplasmic domain of Vam3 (1-264), H<sub>abc</sub> domain (1-145), linker domain (116-186), and SNARE domain (182-264) were expressed as C-terminal GST fusions. GST and the exocytic Qa SNARE, Sso1-GST (1-265), were negative controls. Coomassie stained gel of the of GST-fusions proteins shown. ~450 OD<sub>600 nm</sub> × mL of yeast detergent lysate were incubated with resins for 2 h at 4° C, washed three times with binding buffer, eluted, and samples were analyzed by SDS-PAGE and western blot (WB) for Vps11 or Vps18 and Vps33.

**Figure S2.** Vps33 binds vacuole Qa, Qc, and R SNAREs and the quaternary SNARE complex. As in Figure 2A, the C-terminal GST fusions were made to the cytoplasmic domains of Vam3, Vti1, Vam7, and Nyv1. SNARE complexes were formed of cytoplasmic domain of Vam3. Sso1 was used as a negative control. ~30 µg (1 µM) of each GST-fusion protein were incubated with 10.5 µg (~0.25 µM) purified Vps33 for 2 h at 30° C, washed three times with binding buffer, and eluted with binding buffer supplemented with 10mM reduced glutathione, pH 7.4. Samples were analyzed by SDS-PAGE and western blot for Vps33.

**Figure S3.** Vps33 binds Pep12. (A) For pulldowns on Vam3 or Pep12, the cytoplasmic domain of Vam3 (1-264) or Pep12 (1-268) were expressed as C-terminal GST fusions. GST and the exocytic Qa SNARE, Sso1-GST (1-265), were negative controls. Coomassie stained gel of the of GST-fusions proteins shown. ~450 OD<sub>600 nm</sub> × mL of yeast detergent lysate were incubated with resins for 2 h at 4° C, washed three times with binding buffer, eluted, and samples were analyzed by SDS-PAGE and western blot (WB) for Vps41, Vps11 and Vps33. (B) The cytoplasmic domains of the Vam3 and Pep12 were fused to GST. C-terminal GST-fusions of Sed5 (1-319), Sso1 (1-265), and GST were used as negative controls. 1 µg of purified Vps33 was incubated resins pre-bound to GST-fusion proteins for 2 h at 4° C. Resins were washed, and bound fractions were eluted and analyzed by SDS-PAGE and western blot for Vps33.

**Figure S4.** Vps33 binds Vam7 through its SNARE domain. GST-fusions to the Vam7 cytoplasmic domain, Vam7<sub>PX</sub>, Vam7<sub>SNARE</sub>, and the vacuole SNARE complex were used to pulldown purified Vps33. Sec22 and GST were used as negative controls. SNARE complexes were formed using purified Vam3-GST (1-264) bound to GSH resin and incubated overnight at 4° C with a five-fold excess of purified His<sub>7</sub>-MBP-Vti1 (1-194), His<sub>6</sub>-GFP-Vam7<sub>SNARE</sub> (190-316), and His<sub>6</sub>-Nyv1 (1-231). 10.5 µg of purified Vps33 was incubated for 2 h at 30° C, washed three times with binding buffer, and eluted. Samples were separated by SDS-PAGE and analyzed by western blot for Vps33.

**Figure S5.** Characterization of chromosomal integrations of Vps33 point mutations. (A) Cultures grown overnight at 24° C were plated onto SC-URA, YPD, or YPD+5mM ZnCl<sub>2</sub> as 20-fold dilutions from 1.0 OD<sub>600 nm</sub> × mL. Plates were incubated for 48 h and imaged. (B) Strains were grown in minimal media to late mid-log phase, and vacuoles were imaged by fluorescence microscopy after labeling with FM4-64.

# Supplemental One

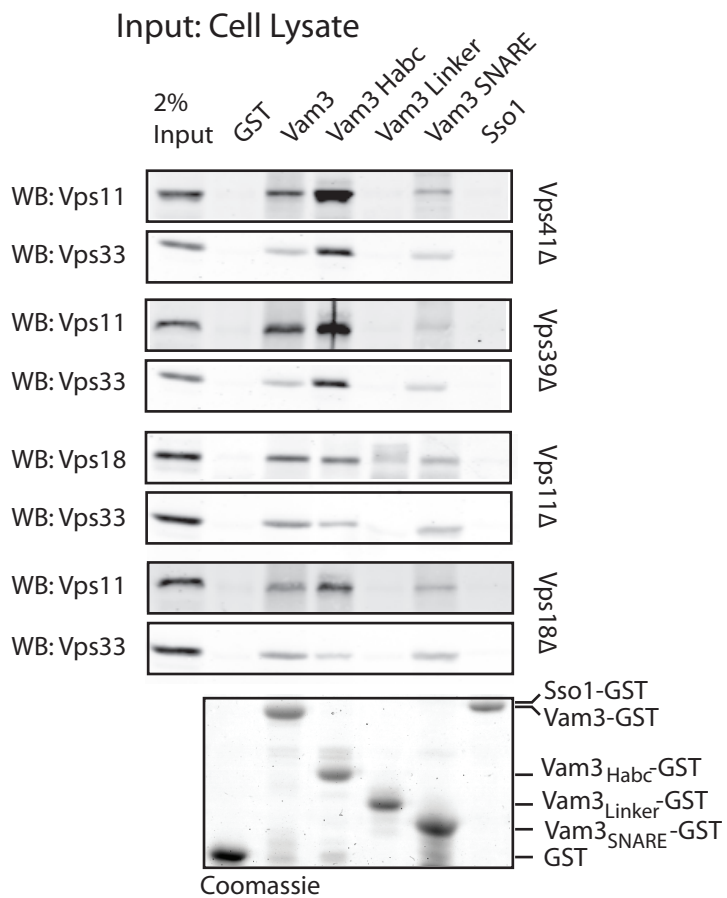

# Supplemental Two

Input: Purified Vps33

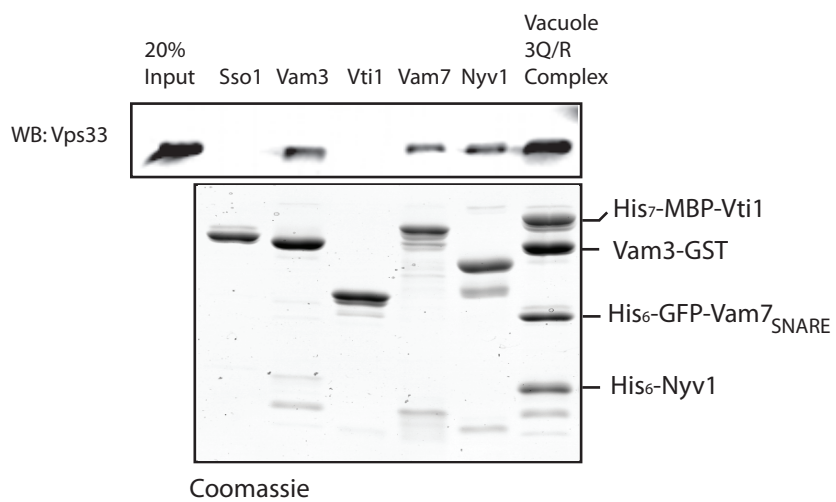

# Supplemental Three

A) Input: Cell Lysate

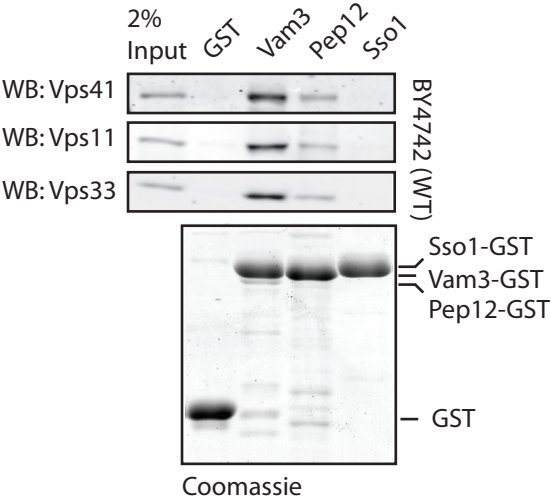

B) Input: Purified Vps33

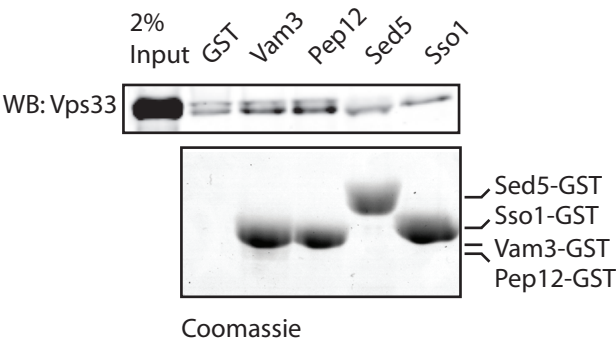

# Supplemental Four

Input: Purified Vps33

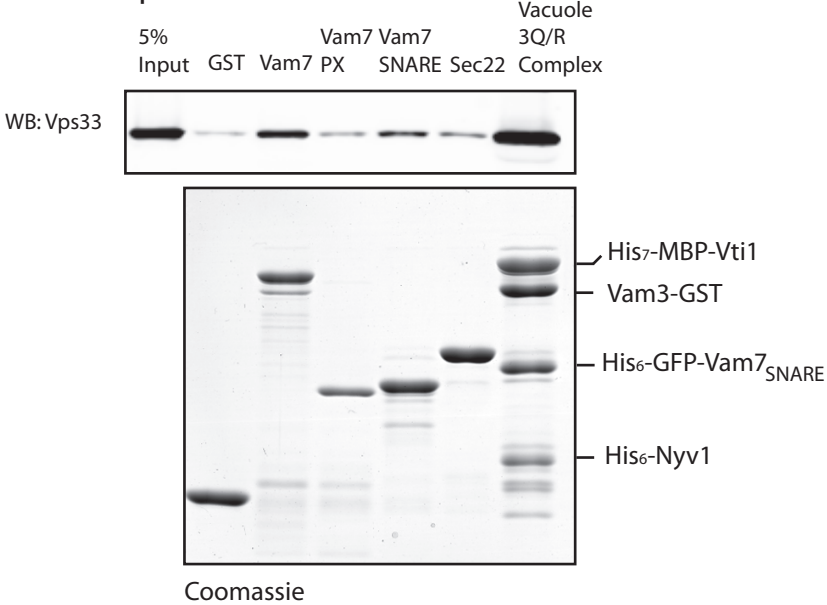



# Supplemental Five

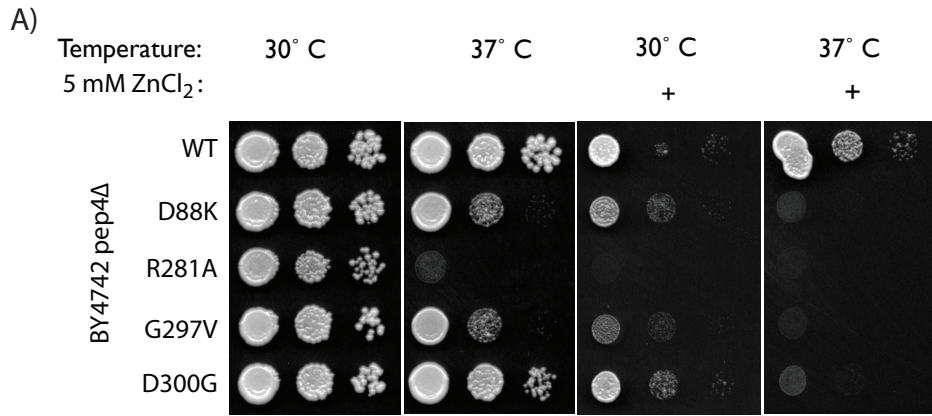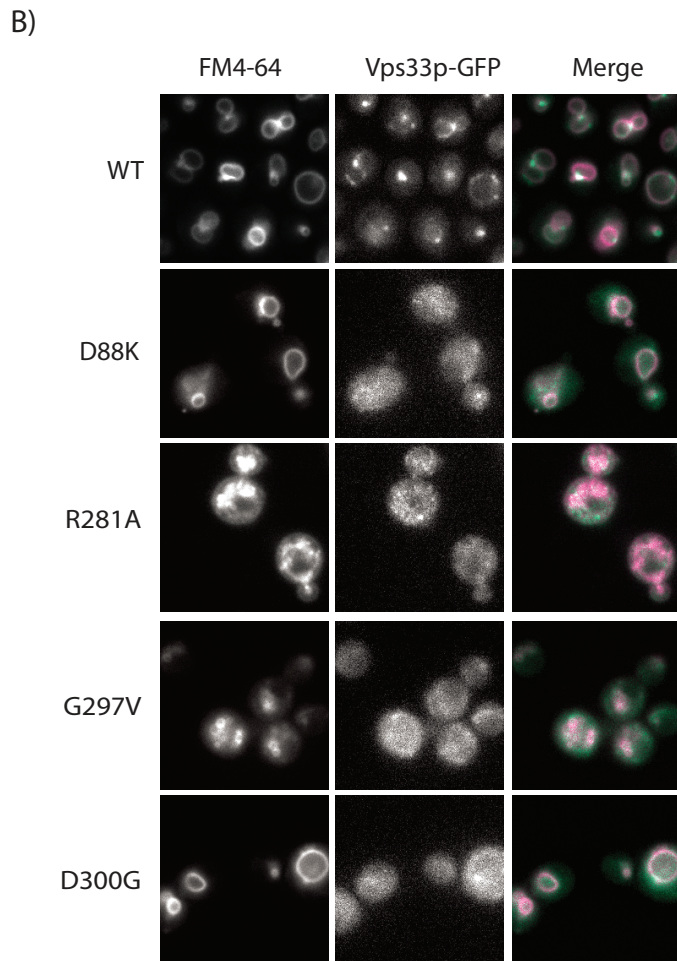

Supplement: supp_E12-05-0343v1_CombinedSupMats.pdf [file supp_E12-05-0343v1_CombinedSupMats.pdf]
